# Supplementary material for: Design of a novel Pt(ii) complex to reverse cisplatin-induced resistance in lung cancer via a multi-mechanism
Source: Royal Society of Chemistry journal article supplement (doi:10.1039/d1dt03964d), 2022-01-01
Supplement: d1dt03964d1.pdf [file d1dt03964d1.pdf]

## Supporting Information

### Design of a Novel Pt(II) Complex to Reverse Cisplatin-Induced Resistance in Lung Cancer via Multi-mechanism

Ming Jiang<sup>a,b,1</sup>, Tongfu Yang<sup>a,1</sup>, Yong Chu<sup>a</sup>, Zhenlei Zhang<sup>a</sup>, Hongbin Sun<sup>c</sup>,  
Hong Liang<sup>a</sup>, Feng Yang<sup>a\*</sup>

<sup>a</sup> State Key Laboratory for Chemistry and Molecular Engineering of Medicinal Resources, Collaborative Innovation Center for Guangxi Ethnic Medicine, School of Chemistry and Pharmaceutical Sciences, Guangxi Normal University, Guilin, Guangxi 541004, China

<sup>b</sup> School of food and biochemical engineering, Guangxi Science & Technology Normal University, Laibin, Guangxi 546199, China

<sup>c</sup> Jiangsu Key Laboratory of Drug Discovery for Metabolic Disease, China Pharmaceutical University, Nanjing, Jiangsu 210009, China

<sup>1</sup> M Jiang and TF Yang pay the same contribution for the article.

\*Corresponding author:

Feng Yang, [fyang@mailbox.gxnu.edu.cn](mailto:fyang@mailbox.gxnu.edu.cn)

Phone/Fax: 86-773-212-0958

Address: 15 Yucai Road, Guilin, Guangxi, China. Zip code: 541004

## Contents

|                                                              |    |
|--------------------------------------------------------------|----|
| <b>Supporting Tables</b> .....                               | S3 |
| <b><sup>1</sup>H NMR and ESI-MS of L1-L6 and C1-C6</b> ..... | S5 |

Tab. S1 Crystal data of the Pt(II) complexes

| Pt (II)<br>complexes        | C1                                                               | C2                                                   | C3                                                   | C4                                                   | C5                                                   | C6                                                   |
|-----------------------------|------------------------------------------------------------------|------------------------------------------------------|------------------------------------------------------|------------------------------------------------------|------------------------------------------------------|------------------------------------------------------|
| Empirical formula           | C <sub>12</sub> H <sub>18</sub> N <sub>8</sub> O <sub>2</sub> Pt | C <sub>12</sub> H <sub>14</sub> N <sub>8</sub> PtS   | C <sub>22</sub> H <sub>18</sub> N <sub>8</sub> PtS   | C <sub>24</sub> H <sub>23</sub> N <sub>8</sub> PtS   | C <sub>18</sub> H <sub>26</sub> N <sub>8</sub> PtS   | C <sub>14</sub> H <sub>18</sub> N <sub>8</sub> Pt    |
| Formula weight              | 629.67                                                           | 593.64                                               | 717.77                                               | 746.83                                               | 677.8                                                | 621.69                                               |
| Crystal system              | orthorhombic                                                     | monoclinic                                           | monoclinic                                           | triclinic                                            | monoclinic                                           | monoclinic                                           |
| Space group                 | Pbca                                                             | P2 <sub>1</sub> /n                                   | P2 <sub>1</sub> /n                                   | P-1                                                  | P2 <sub>1</sub> /n                                   | P2 <sub>1</sub> /c                                   |
| a/Å                         | 12.0032(7)                                                       | 4.0079(3)                                            | 8.35800(10)                                          | 8.8378(6)                                            | 9.62910(10)                                          | 8.8524(2)                                            |
| b/Å                         | 9.1694(4)                                                        | 17.0621(10)                                          | 9.46980(10)                                          | 11.4663(9)                                           | 8.75510(10)                                          | 4.00670(10)                                          |
| c/Å                         | 19.1587(12)                                                      | 12.9516(6)                                           | 16.0146(2)                                           | 14.3741(12)                                          | 14.4580(2)                                           | 27.1392(6)                                           |
| α/°                         | 90                                                               | 90                                                   | 90                                                   | 68.768(8)                                            | 90                                                   | 90                                                   |
| β/°                         | 90                                                               | 95.180(5)                                            | 99.0950(10)                                          | 82.547(6)                                            | 91.1320(10)                                          | 90.532(2)                                            |
| γ/°                         | 90                                                               | 90                                                   | 90                                                   | 78.354(6)                                            | 90                                                   | 90                                                   |
| Volume/Å <sup>3</sup>       | 2108.65(19)                                                      | 882.06(9)                                            | 1251.60(3)                                           | 1327.25(19)                                          | 1218.63(3)                                           | 962.56(4)                                            |
| Z                           | 4                                                                | 2                                                    | 2                                                    | 2                                                    | 2                                                    | 2                                                    |
| GOOF                        | 1.171                                                            | 1.025                                                | 1.104                                                | 0.997                                                | 1.03                                                 | 1.116                                                |
| Final R indexes [I>=2σ (I)] | R <sub>1</sub> = 0.0464,<br>wR <sub>2</sub> = 0.0877             | R <sub>1</sub> = 0.0342,<br>wR <sub>2</sub> = 0.0741 | R <sub>1</sub> = 0.0231,<br>wR <sub>2</sub> = 0.0617 | R <sub>1</sub> = 0.0463,<br>wR <sub>2</sub> = 0.0773 | R <sub>1</sub> = 0.0399,<br>wR <sub>2</sub> = 0.0996 | R <sub>1</sub> = 0.0282,<br>wR <sub>2</sub> = 0.0757 |
| Final R indexes [all data]  | R <sub>1</sub> = 0.0799,<br>wR <sub>2</sub> = 0.0965             | R <sub>1</sub> = 0.0524,<br>wR <sub>2</sub> = 0.0847 | R <sub>1</sub> = 0.0251,<br>wR <sub>2</sub> = 0.0631 | R <sub>1</sub> = 0.0861,<br>wR <sub>2</sub> = 0.0957 | R <sub>1</sub> = 0.0412,<br>wR <sub>2</sub> = 0.1015 | R <sub>1</sub> = 0.0306,<br>wR <sub>2</sub> = 0.0778 |
| CCDC.No                     | 2015666                                                          | 2015667                                              | 2015669                                              | 2015670                                              | 2015671                                              | 2015668                                              |

Tab. S2 Bond Angles /° for C1-C6.

|                                      | C1      | C2        | C3       | C4      | C5       | C6        |
|--------------------------------------|---------|-----------|----------|---------|----------|-----------|
| S1 <sup>1</sup> -Pt1-S1              | 180.0   | 180.0     | 180.0    | 180.0   | 180.0    | 180.0     |
| N2 <sup>1</sup> -Pt1-S1              | 83.1(2) | 82.98(17) | 97.33(7) | 82.7(2) | 97.69(7) | 97.25(10) |
| N2-Pt1-S1                            | 96.9(2) | 97.02(17) | 82.67(7) | 97.3(2) | 82.31(7) | 82.75(10) |
| N2 <sup>1</sup> -Pt1-S1 <sup>1</sup> | 83.1(2) | 82.98(17) | 97.33(7) | 82.7(2) | 97.69(7) | 97.25(10) |
| N2 <sup>1</sup> -Pt1-S1 <sup>1</sup> | 96.9(2) | 97.02(17) | 82.67(7) | 97.3(2) | 82.31(7) | 82.75(10) |
| N2 <sup>1</sup> -Pt1-N2              | 180.0   | 180.0     | 180.0    | 180.0   | 180.0    | 180.0     |

Tab. S3 Bond Lengths /Å for C1-C6

|                     | C1       | C2         | C3        | C4       | C5        | C6         |
|---------------------|----------|------------|-----------|----------|-----------|------------|
| Pt1-S1              | 2.288(3) | 2.2968(19) | 2.2800(9) | 2.294(3) | 2.2800(8) | 2.2867(10) |
| Pt1-S1 <sup>1</sup> | 2.288(3) | 2.2969(19) | 2.2800(9) | 2.294(3) | 2.2800(8) | 2.2867(10) |
| Pt1-N2              | 2.015(8) | 2.023(6)   | 2.022(2)  | 2.012(7) | 2.024(3)  | 2.020(3)   |
| Pt1-N2 <sup>1</sup> | 2.015(8) | 2.023(6)   | 2.022(2)  | 2.012(7) | 2.024(3)  | 2.020(3)   |

Tab. S4 IC<sub>50</sub> values of the tested compounds against different cell lines for 72 h.

| Complexes                        | IC <sub>50</sub> (μM) <sup>a</sup> |              |              |
|----------------------------------|------------------------------------|--------------|--------------|
|                                  | A549                               | A549cisR     | HL-7702      |
| K <sub>2</sub> PtCl <sub>4</sub> | >40                                | >40          | >40          |
| <b>L1</b>                        | >40                                | >40          | >40          |
| <b>L2</b>                        | 38.63 ± 2.09                       | >40          | >40          |
| <b>L3</b>                        | 31.74 ± 1.93                       | >40          | >40          |
| <b>L4</b>                        | 27.98 ± 1.79                       | >40          | >40          |
| <b>L5</b>                        | 25.68 ± 1.28                       | 38.26 ± 1.87 | >40          |
| <b>L6</b>                        | 23.09 ± 1.02                       | 33.55 ± 1.64 | 31.26 ± 1.17 |
| <b>C1</b>                        | 9.43 ± 0.44                        | 13.35 ± 0.52 | 18.73 ± 0.83 |
| <b>C2</b>                        | 7.92 ± 0.31                        | 11.50 ± 0.41 | 16.68 ± 0.67 |
| <b>C3</b>                        | 7.03 ± 0.28                        | 8.11 ± 0.30  | 13.13 ± 0.45 |
| <b>C4</b>                        | 6.26 ± 0.21                        | 7.36 ± 0.41  | 11.52 ± 0.54 |
| <b>C5</b>                        | 4.49 ± 0.18                        | 6.65 ± 0.32  | 9.25 ± 0.43  |
| <b>C6</b>                        | 2.55 ± 0.12                        | 3.18 ± 0.17  | 7.09 ± 0.31  |
| Cisplatin                        | 8.15 ± 0.39                        | 25.97 ± 0.85 | 7.14 ± 0.22  |

Table S5 Acute toxicity of C6 (alive/total)

|           | 5 μmol/kg | 10 μmol/kg | 15 μmol/kg | 20 μmol/kg | 25 μmol/kg |
|-----------|-----------|------------|------------|------------|------------|
| <b>C6</b> | 10/10     | 3/10       | 5/10       | 6/10       | 9/10       |

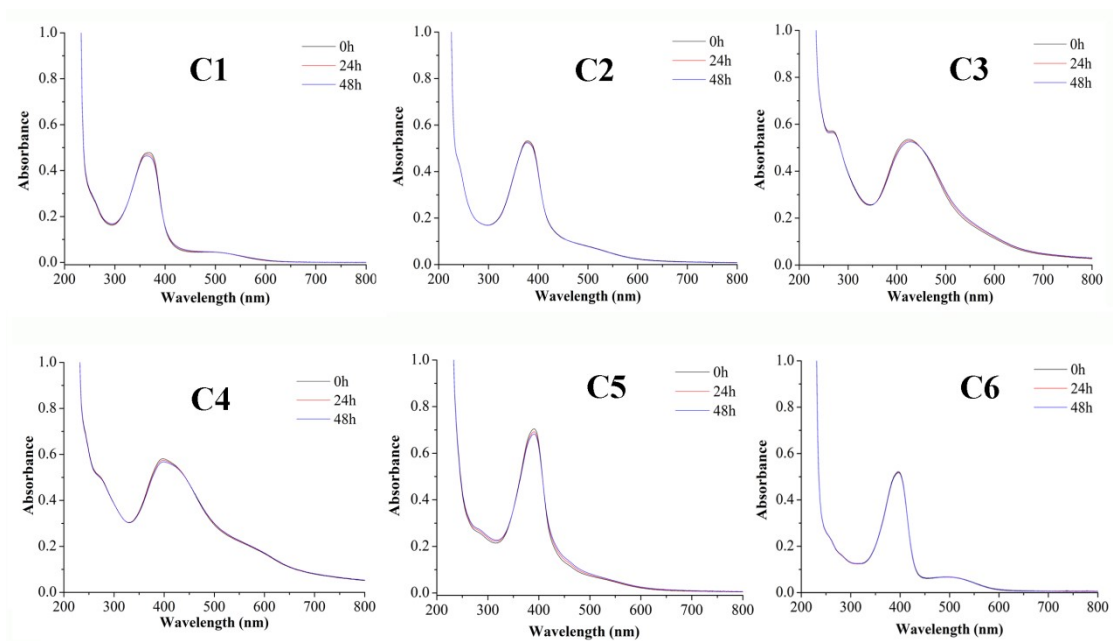

**Fig. S1** The stability of UV-Vis spectra of the complexes (C1-C6) in PBS at different times.

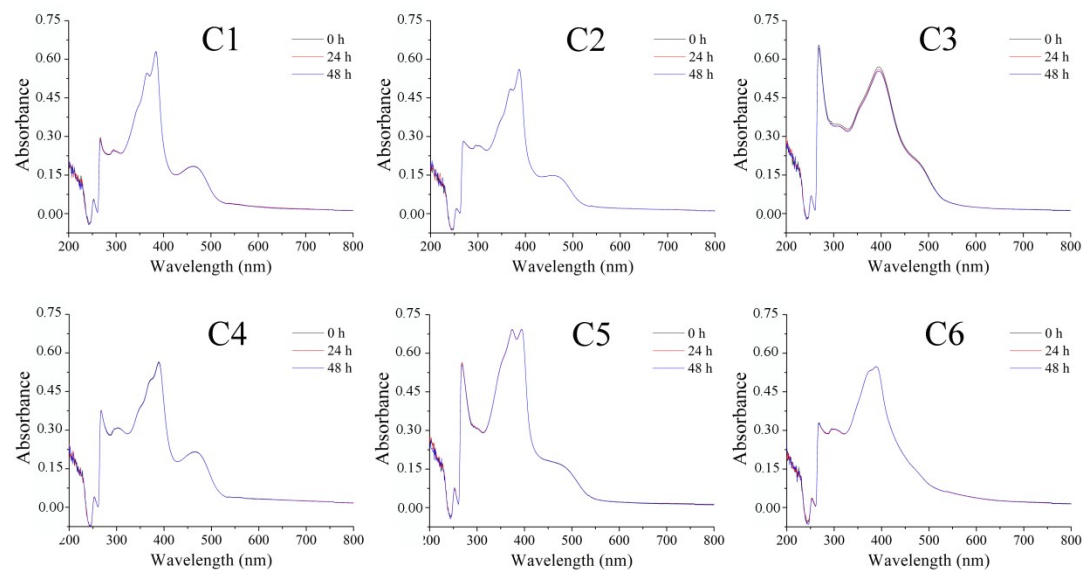

**Fig. S2** The stability of UV-Vis spectra of the complexes (C1-C6) in DMEM at different times.

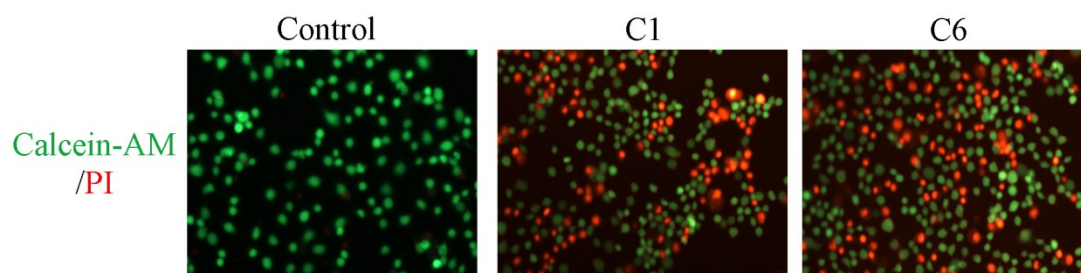

**Fig. S3** Detection of cytotoxicity after C1 and C6 (5  $\mu$ M) treatment using fluorescent probes (double staining with calcein-AM/PI) for 24 h.

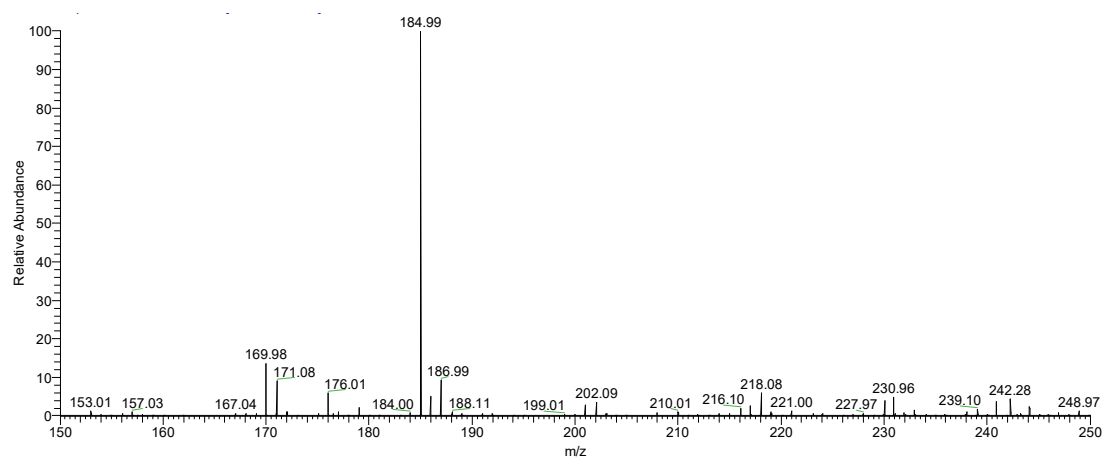

**Fig. S4** The ESI-MS of L1.

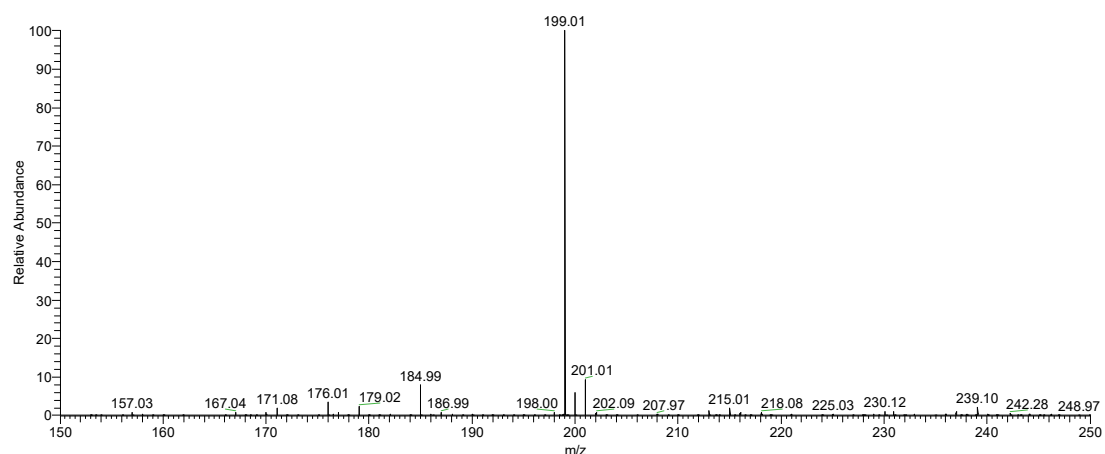

**Fig. S5** The ESI-MS of L2.

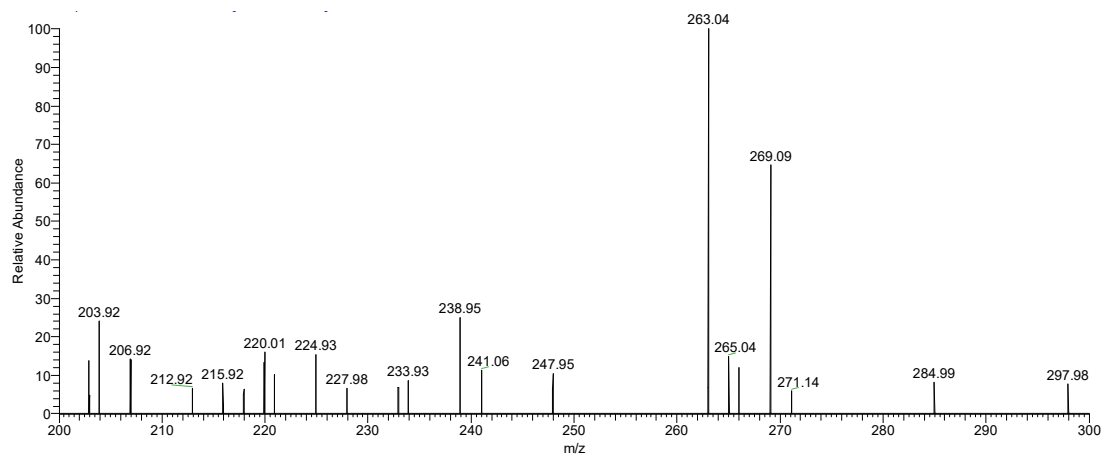

**Fig. S6** The ESI-MS of L3.

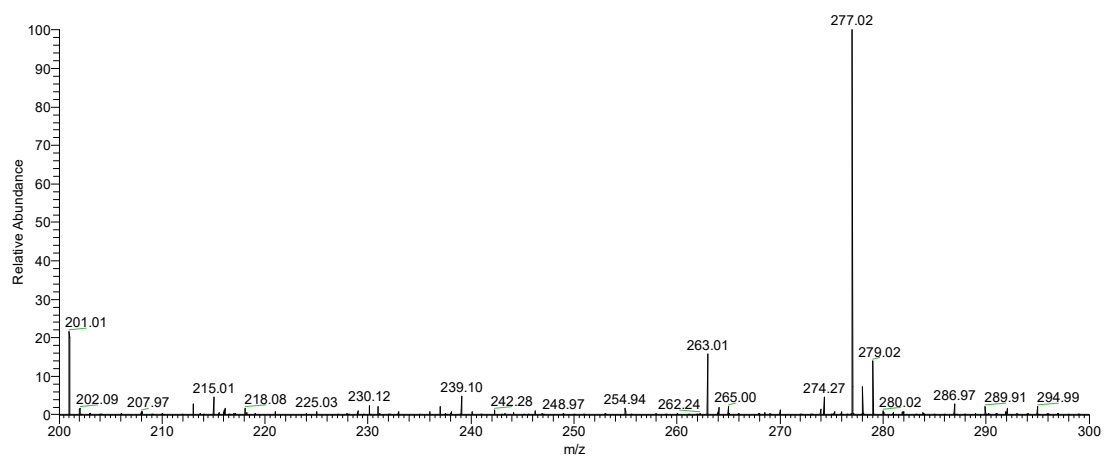

**Fig. S7** The ESI-MS of L4.

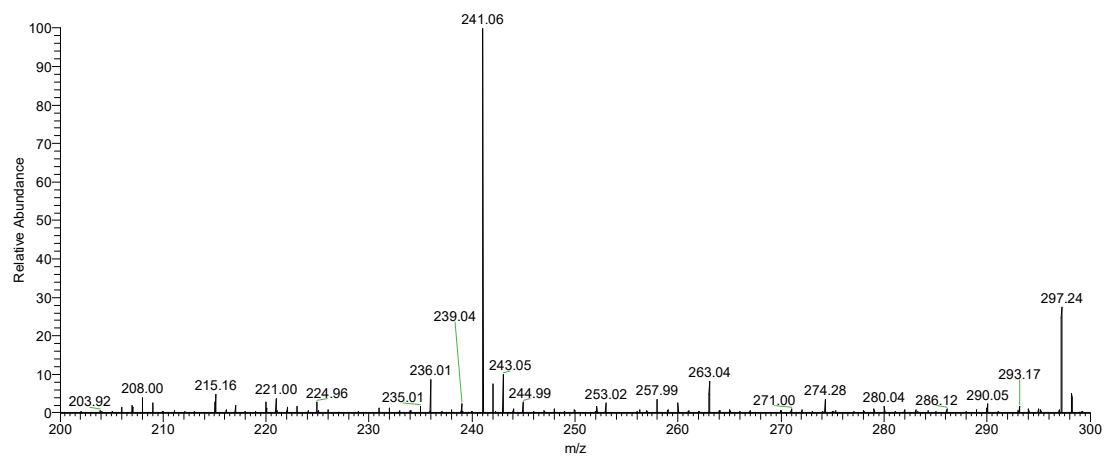

**Fig. S8** The ESI-MS of L5.

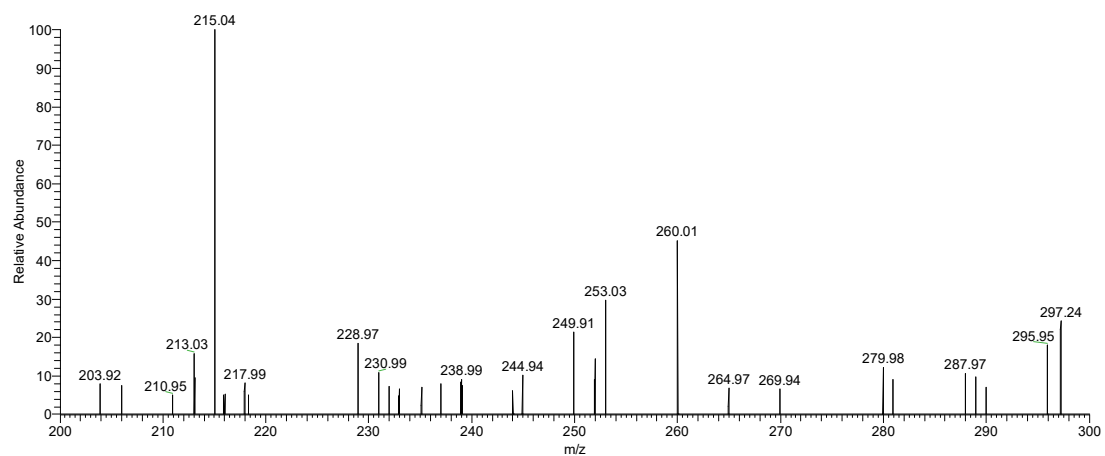

**Fig. S9** The ESI-MS of L6.



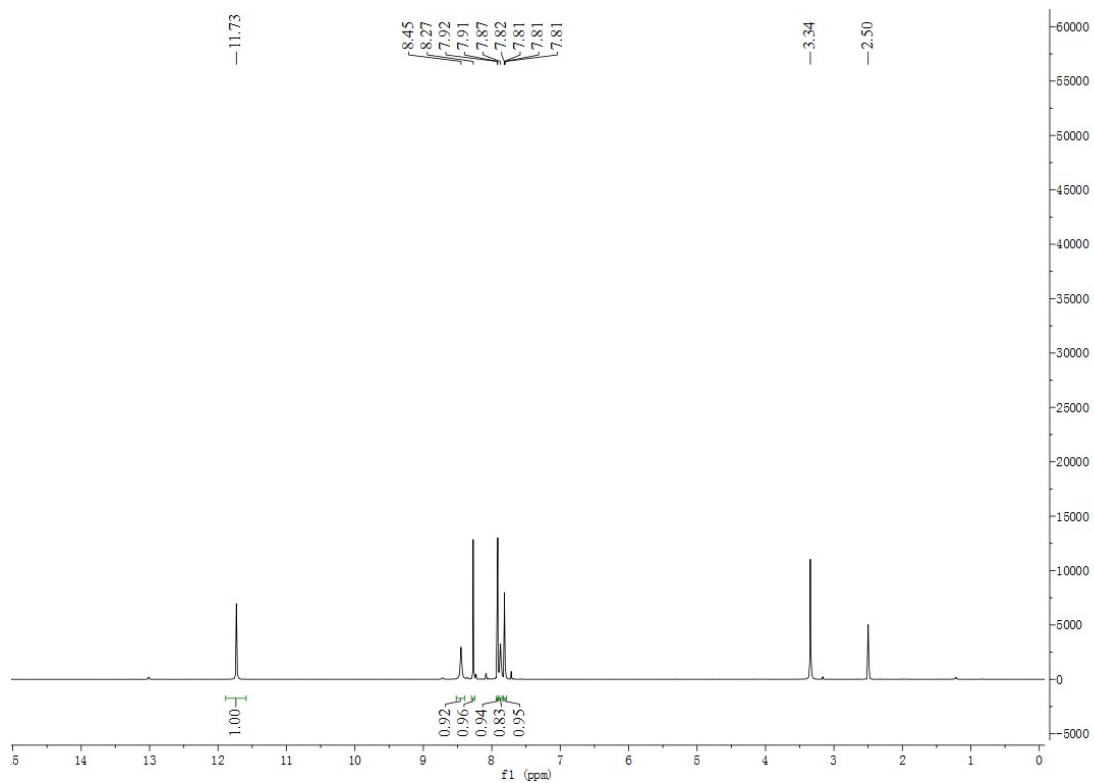

**Fig. S10**  $^1\text{H}$  NMR spectrum of **L1**.

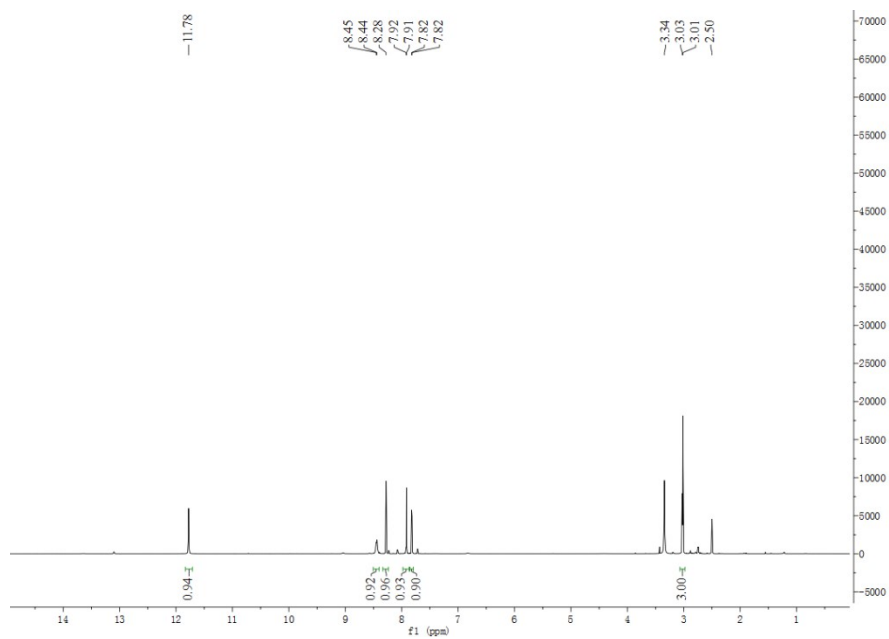

**Fig. S11**  $^1\text{H}$  NMR spectrum of **L2**.

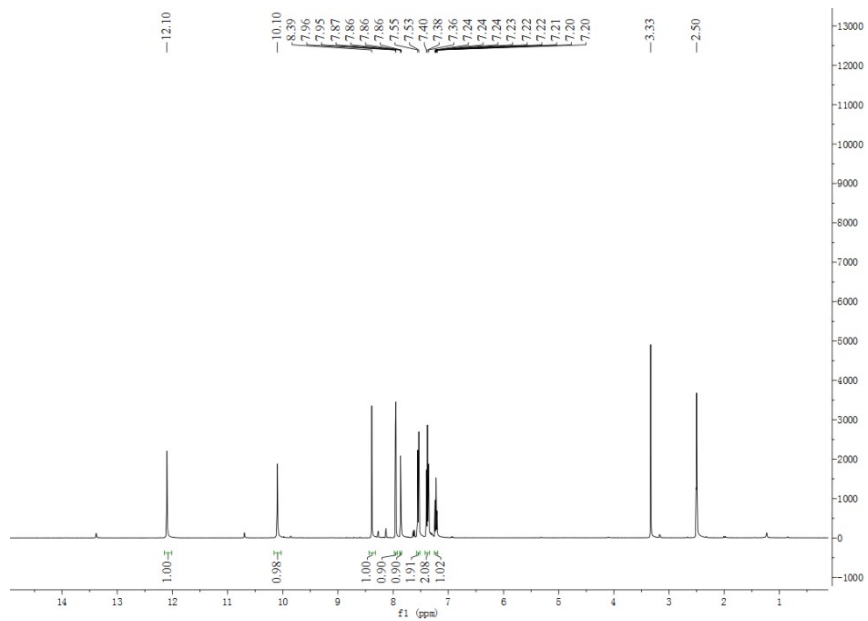

**Fig. S12**  $^1\text{H}$  NMR spectrum of L3.

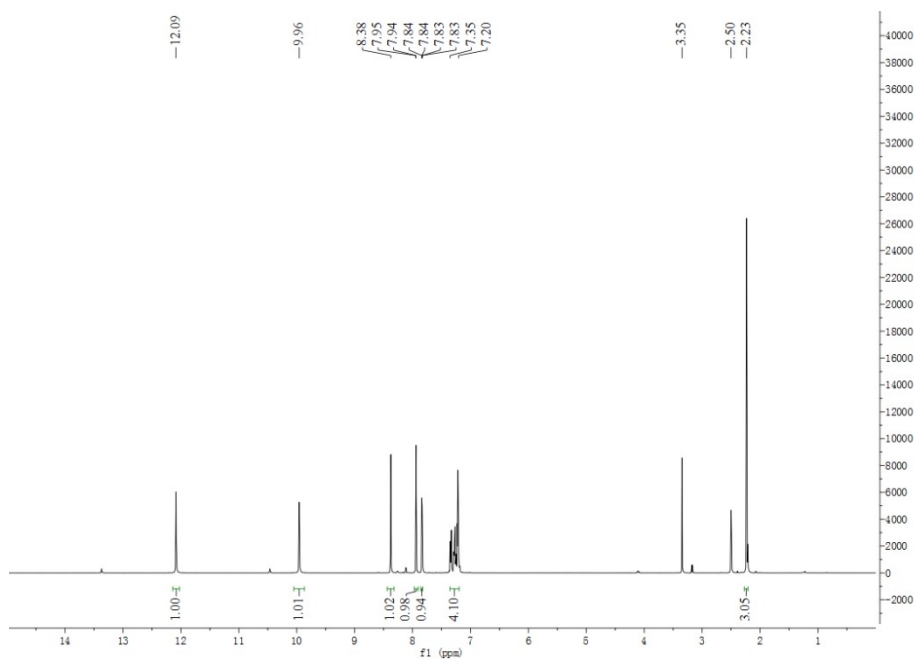

**Fig. S13**  $^1\text{H}$  NMR spectrum of L4.

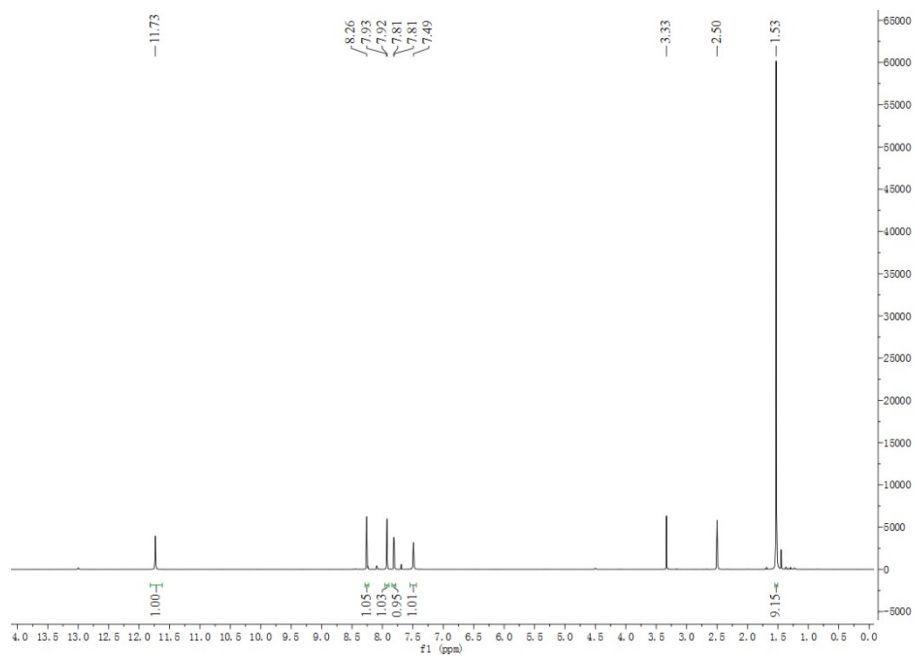

**Fig. S14**  $^1\text{H}$  NMR spectrum of L5.

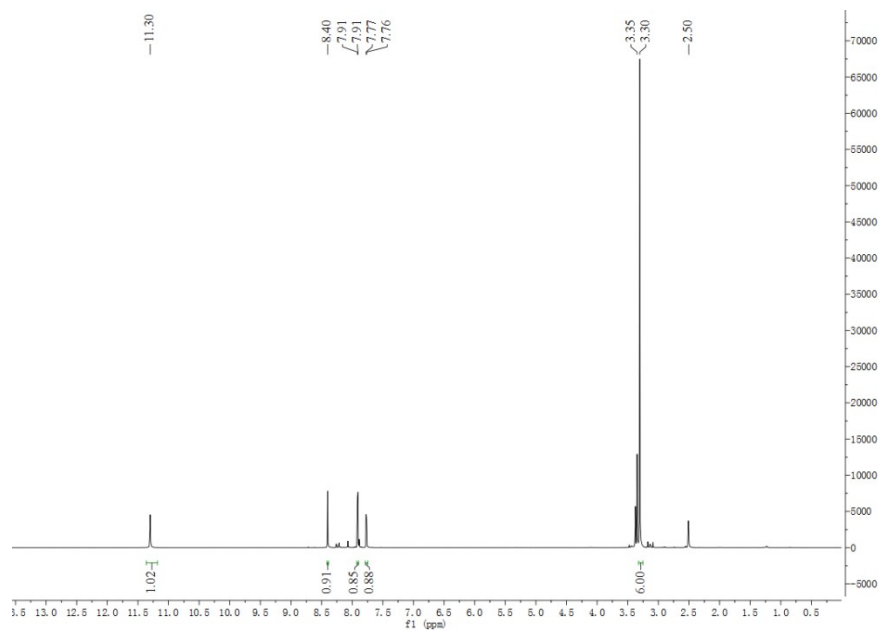

**Fig. S15**  $^1\text{H}$  NMR spectrum of L6.

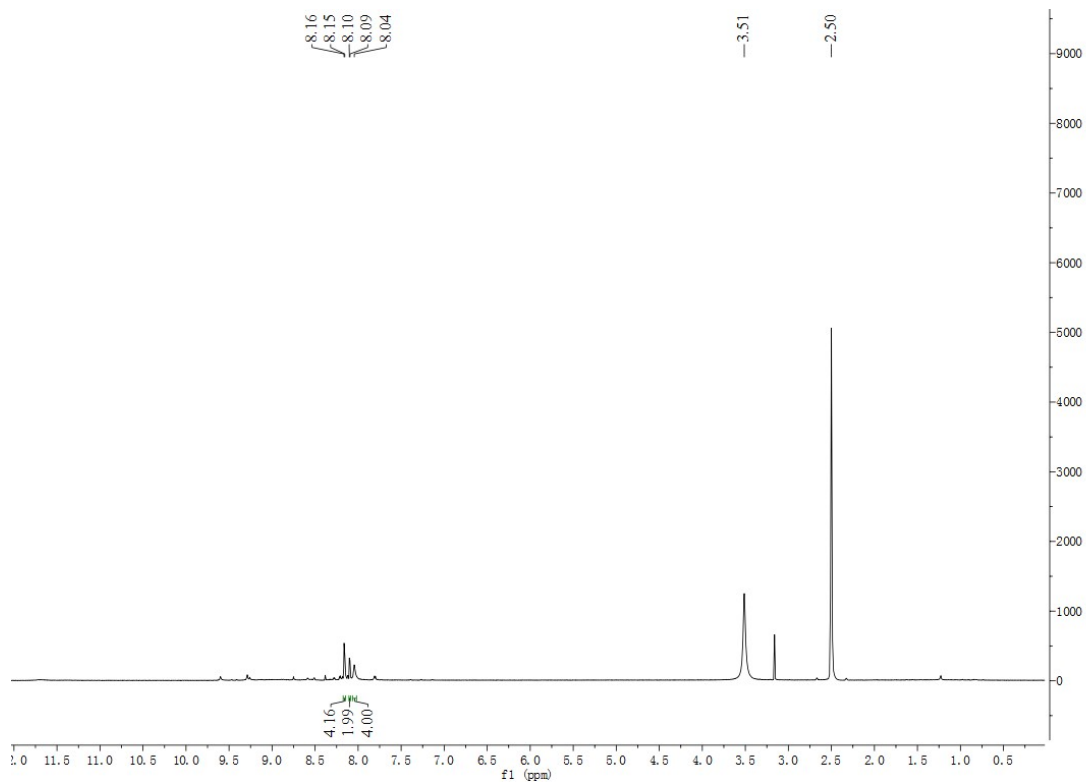

**Fig. S16**  $^1\text{H}$  NMR spectrum of **C1**.

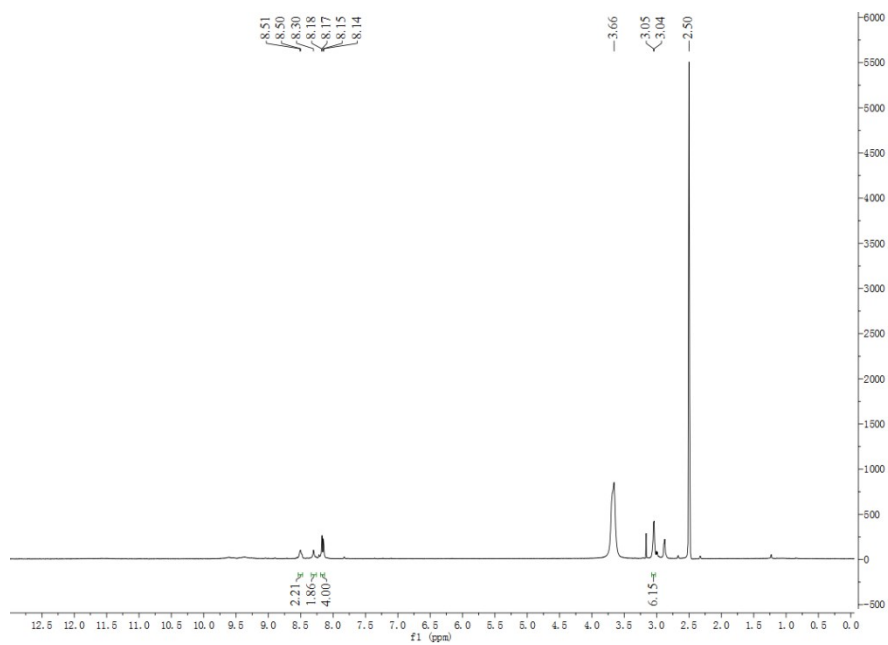

**Fig. S17**  $^1\text{H}$  NMR spectrum of **C2**.

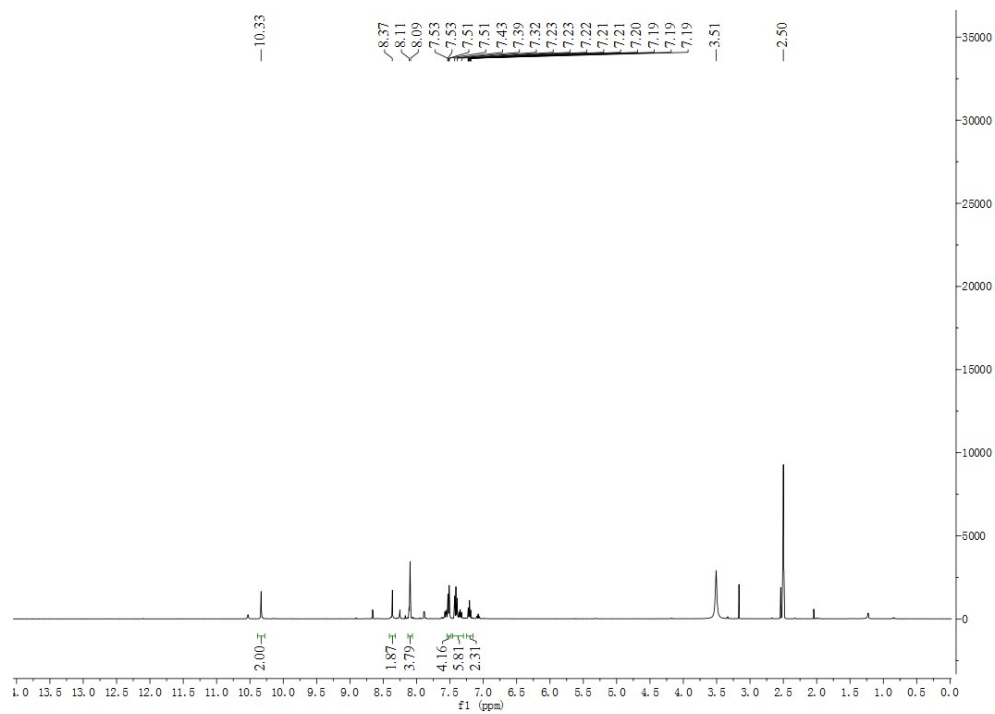

**Fig. S18** <sup>1</sup>H NMR spectrum of C3.

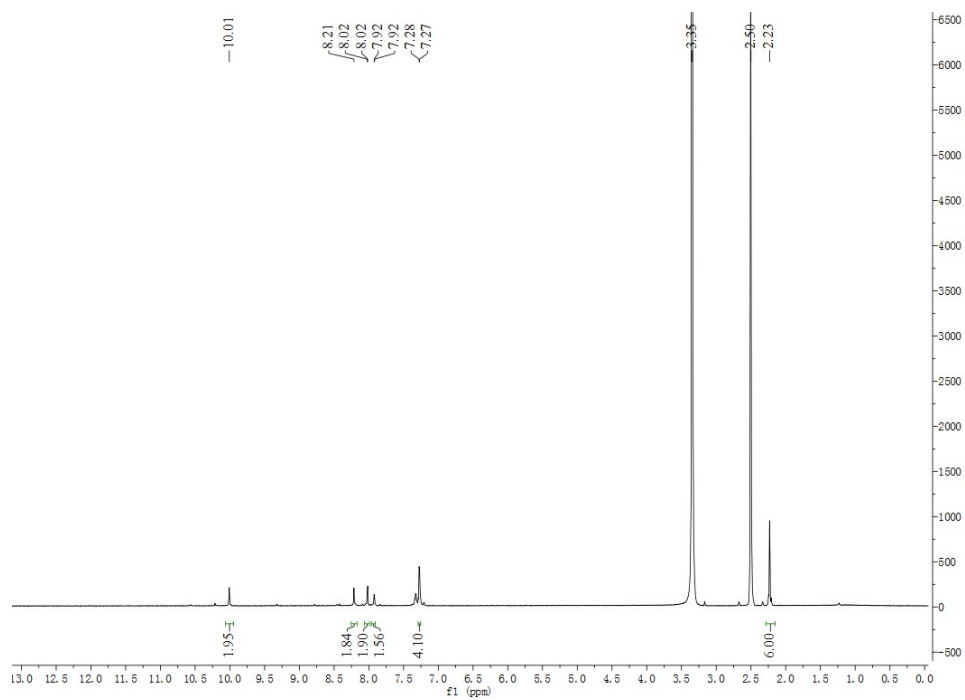

**Fig. S19** <sup>1</sup>H NMR spectrum of C4.

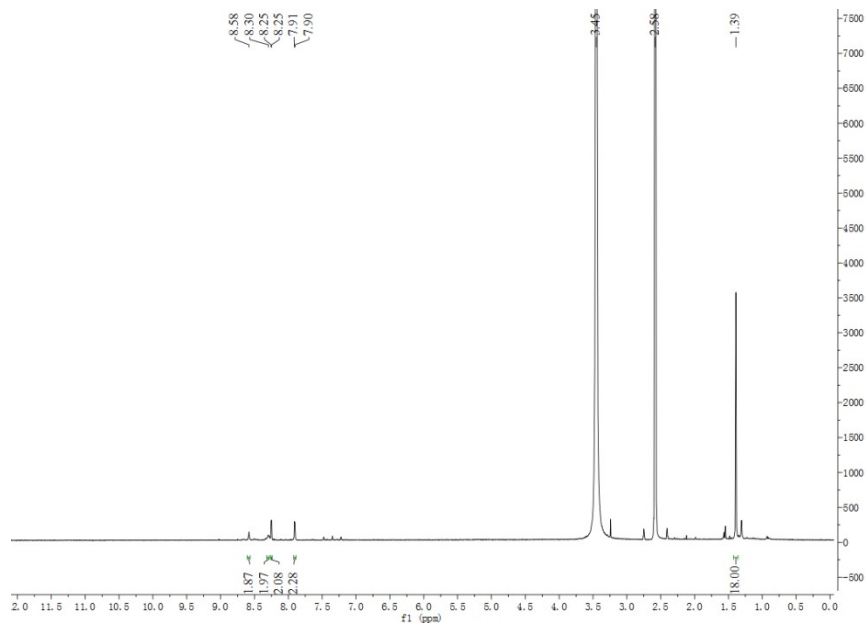

**Fig. S20**  $^1\text{H}$  NMR spectrum of C5.

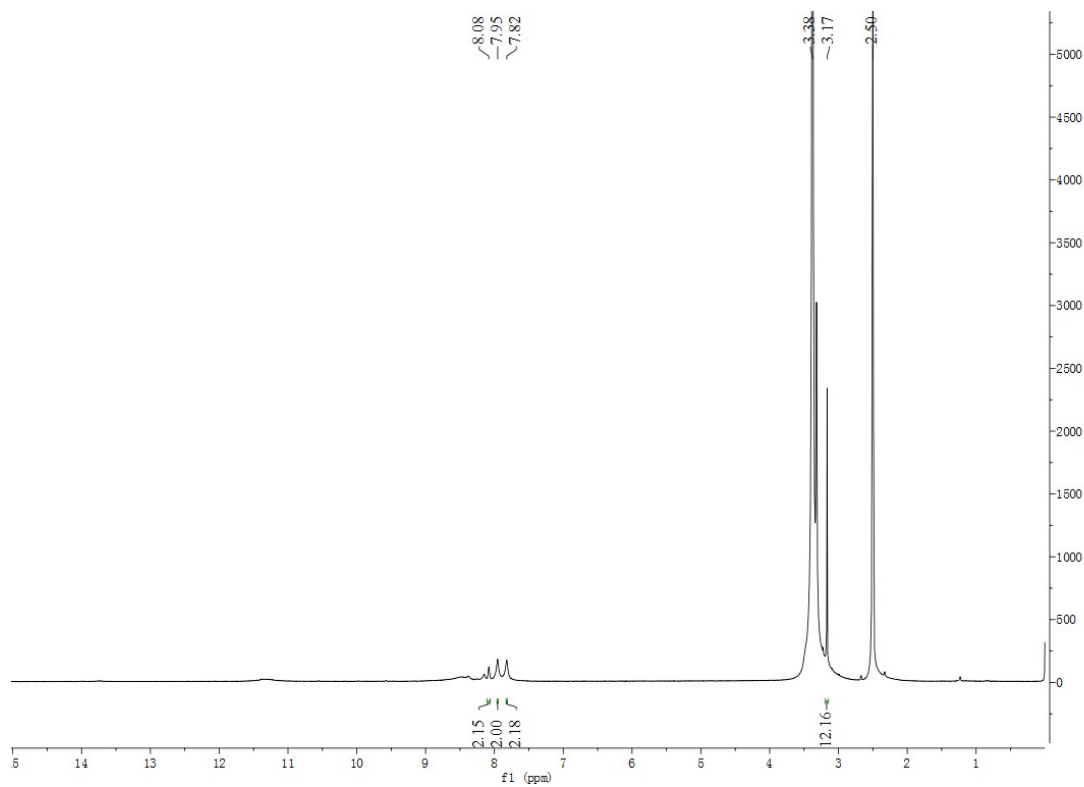

**Fig. S21**  $^1\text{H}$  NMR spectrum of C6.

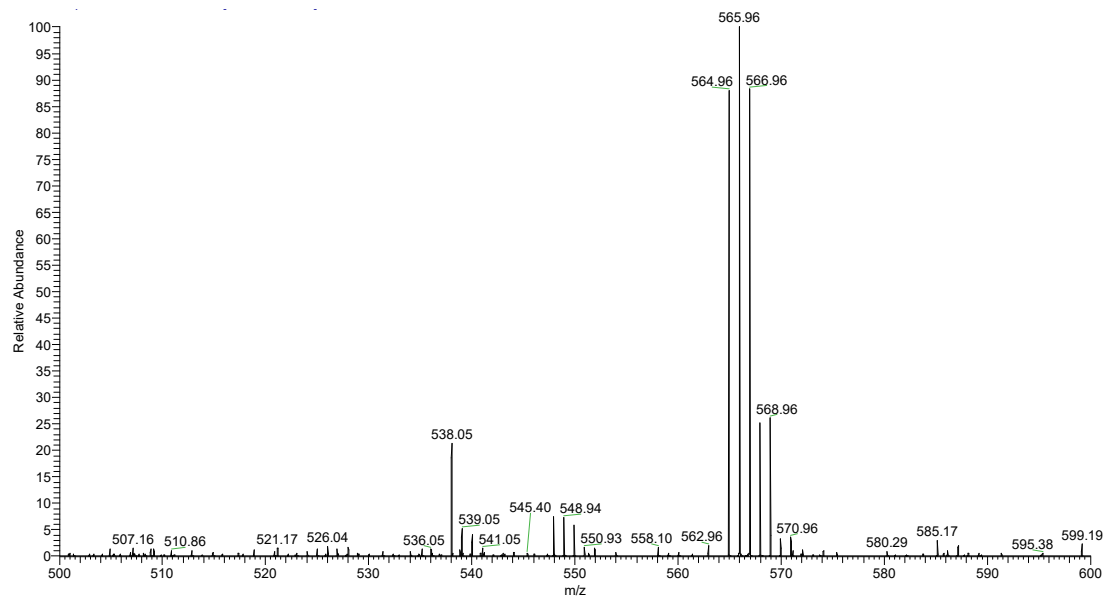

**Fig. S22** The ESI-MS of C1.

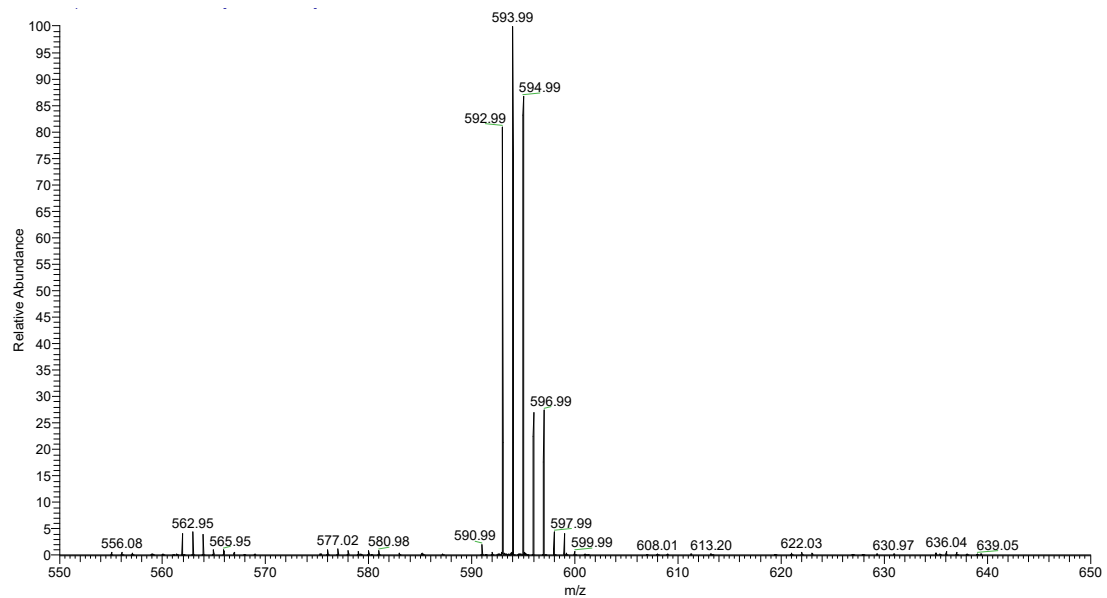

**Fig. S23** The ESI-MS of C2.

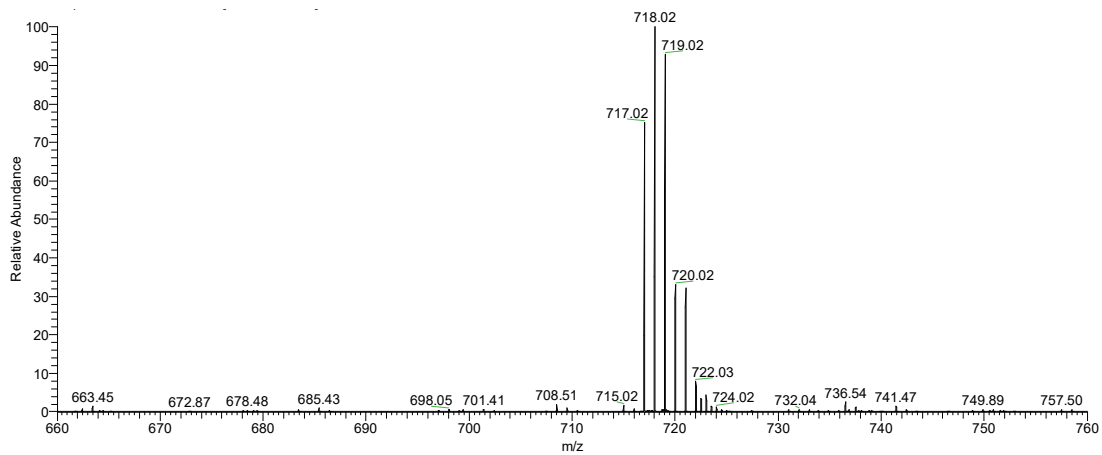

**Fig. S24** The ESI-MS of C3.

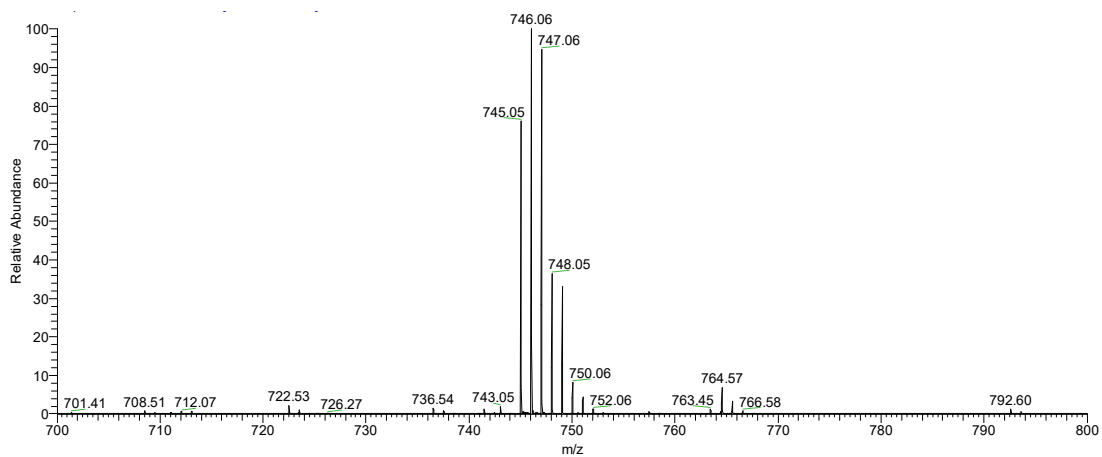

**Fig. S25** The ESI-MS of C4.

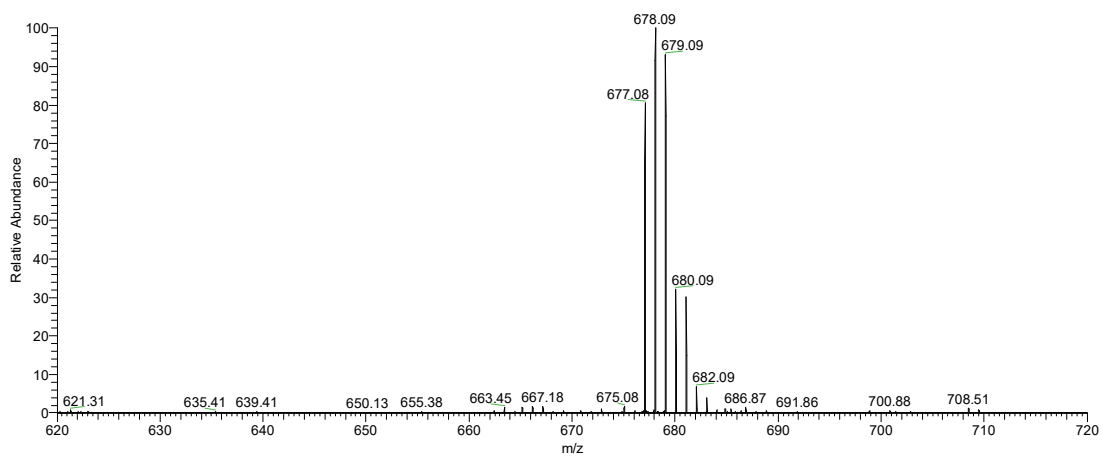

**Fig. S26** The ESI-MS of C5.



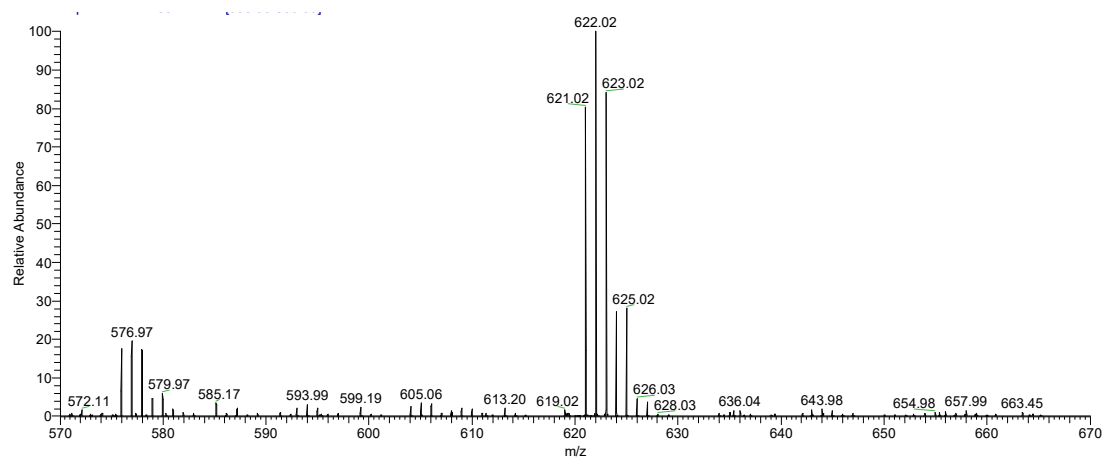

**Fig. S27** The ESI-MS of C6.
